# Supplementary material for: Responses of surface ozone air quality to anthropogenic nitrogen deposition in the Northern Hemisphere
Source: Copernicus journal article supplement (doi:10.5194/acp-2017-242), 2017-04-11
Supplement: Supplementary file 1 [file acp-2017-242-supplement.pdf]

## *Supplement of*

### **Responses of surface ozone air quality to anthropogenic nitrogen deposition in the Northern Hemisphere**

Yuanhong Zhao, et al.

5 *Correspondence to:* Lin Zhang ([zhanglg@pku.edu.cn](mailto:zhanglg@pku.edu.cn))

#### **Section S1**

The section describes modifications we implemented to the CLM v4.5 model for better simulating the soil NO<sub>x</sub> emissions and also reducing the model LAI overestimation. These include addition of soil NO<sub>x</sub> emission and NH<sub>3</sub> volatilization processes, and an improved parameterization of nitrogen uptake by plants. We evaluate the CLM simulated results with satellite LAI observations and soil NO<sub>x</sub> emissions calculated by GEOS-Chem.

#### **15 S1.1 Soil NO<sub>x</sub> emissions**

The original CLM4.5 model does not estimate NO<sub>x</sub> emissions from soil. Here we implement a process-based parameterization of soil NO<sub>x</sub> emission as described by Parton et al. (2001). This parameterization has been recently applied to the land model LM3V-N (Huang et al., 2015). In the parameterization, soil NO<sub>x</sub> from nitrification and denitrification is estimated based on the NO<sub>x</sub> over N<sub>2</sub>O emission ratio, which varies with the gas diffusivity (D/D<sub>0</sub>) (Parton et al., 2001).

$$R_{\text{NO}_x:\text{N}_2\text{O}} = 15.2 + \frac{35.4 \times \text{ATAN}\left[0.68 \times \pi \times \left(10 \times \frac{D}{D_0} - 1.86\right)\right]}{\pi} \quad (1)$$

And the gas diffusivity is calculated as a function of air filled porosity (AFPS) (Davidson and Trumbore, 1995):

$$25 \quad \frac{D}{D_0} = 0.209 \times \text{AFPS}^{\frac{4}{3}} \quad (2)$$

Above-soil NO<sub>x</sub> emissions are thus derived from soil N<sub>2</sub>O emissions as already estimated in CLM4.5 and the  $R_{\text{NO}_x:\text{N}_2\text{O}}$  ratios. However, we find that soil NO<sub>x</sub> emissions derived from the original CLM and this parameterization show a distinctly

30 different spatial pattern from those calculated in GEOS-Chem with the scheme of  
 Hudman et al. (2012) (Figure S1). To improve the consistency, we also add the  
 process of NH<sub>3</sub> volatilization and update the parameterization of plant nitrogen uptake  
 in the model as described in the sections below. In addition, we have implemented a  
 soil temperature ( $T_{\text{soil}}$ ) dependent factor (the equation below) from Xu and Prentice  
 35 (2008) to the N<sub>2</sub>O and N<sub>2</sub> emission ratio to reduce the CLM high soil NO<sub>x</sub> emissions  
 at high latitudes.

$$f(T_{\text{soil}}) = \exp\left(308.56 \times \left(\frac{1}{68.02} - \frac{1}{T_{\text{soil}}+46.02}\right)\right) \quad (3)$$

### S1.2 NH<sub>3</sub> volatilization

40 NH<sub>3</sub> is highly volatile under high soil temperature and pH conditions. The original  
 CLM calculates abnormally high soil NH<sub>4</sub><sup>+</sup> content over deserts (e.g., more than 20 g  
 N m<sup>2</sup> in Sahara) due to a lack of the NH<sub>3</sub> volatilization process. Here we implement a  
 process-based NH<sub>3</sub> volatilization parameterization in CLM following Xu and Prentice  
 (2008). NH<sub>3</sub> volatilization from soil ( $V_{\text{NH}_3}$ ) is estimated as a function of water filled  
 45 pore space (WFPS), soil pH, and temperature ( $T_{\text{soil}}$ ) given below.

$$V_{\text{NH}_3} = f(\text{pH})f(T_{\text{soil}})(1 - \text{WFPS}) \frac{N_{\text{NH}_4^+}}{b_{\text{NH}_4^+}} \quad (4)$$

where  $N_{\text{NH}_4^+}$  is the soil NH<sub>4</sub><sup>+</sup> content and  $b_{\text{NH}_4^+}$  is the buffer parameter for NH<sub>4</sub><sup>+</sup> (10  
 as given by Huang et al. (2015)). The soil pH factor  $f(\text{pH})$  and soil temperature  
 factor  $f(T_{\text{soil}})$  are given below:

$$50 \quad f(\text{pH}) = e^{2 \times (\text{pH} - 10)} \quad (5)$$

$$f(T_{\text{soil}}) = \min\left(1, e^{308.56 \times \left(\frac{1}{71.02} - \frac{1}{T_{\text{soil}}+46.02}\right)}\right) \quad (6)$$

This NH<sub>3</sub> volatilization parameterization corrects the CLM bias in the soil NH<sub>4</sub><sup>+</sup>  
 concentration over desert areas, and show consistent results with Xu and Prentice  
 (2008).

55

### S1.3 Plant nitrogen uptake

In the original CLM4.5, nitrogen uptake by plants is estimated as plant demand as

long as there is sufficient nitrogen supply. However, many factors may influence plant nitrogen uptake, such as soil inorganic nitrogen concentration, the fine root mass, and soil temperature. Here we follow Thomas et al. (2013) and calculate in CLM the plant nitrogen uptake capacity ( $U_{n,plant}$ ) based on the Hanes-wolf mechanism:

$$U_{n,plant} = V_{n,max} \frac{NH_{4,av} + NO_{3,av}}{(NH_{4,av} + NO_{3,av}) + K_{min}} C_{root} f(T_{soil}) \quad (7)$$

where  $V_{n,max} = 2.7 \times 10^{-8} \text{ g N g C}^{-1} \text{ s}^{-1}$  is the maximum N uptake per unit fine root C at 25 °C;  $NH_{4,av}$  and  $NO_{3,av}$  are available mineral  $NH_4^+$  and  $NO_3^-$  in the soil;  $K_{min} = 0.83 \text{ g N m}^{-2}$  is the half saturation concentration of fine root nitrogen uptake from Kronzucker et al. (1995; 1996),  $C_{root}$  is fine root carbon concentration ( $\text{g C m}^{-2}$ ), and  $f(T_{soil})$  represents the limitation of soil temperature on plant nitrogen uptake that we apply the same function as soil decomposition and nitrification in CLM. The calculated uptake capacity is then compared to the plant demand, and the smaller one defines the plant uptake of mineral nitrogen in the modified CLM.

#### **S1.4 Simulated soil NO<sub>x</sub> emissions and vegetation LAI**

Figure S1 shows the comparison of above-canopy NO<sub>x</sub> emissions derived in GEOS-Chem (Hudman et al., 2012) and CLM. We can see that above-canopy NO<sub>x</sub> emissions from the modified CLM are in good agreement with the GEOS-Chem results. These modifications also partly correct the significant high biases in CLM simulated LAI relative to satellite measurements from MODIS and AVHRR. As shown in Figure S2, there is about 10% bias reduction in the modified CLM LAI, although large positive biases remain over the Northern Hemisphere continents.

80

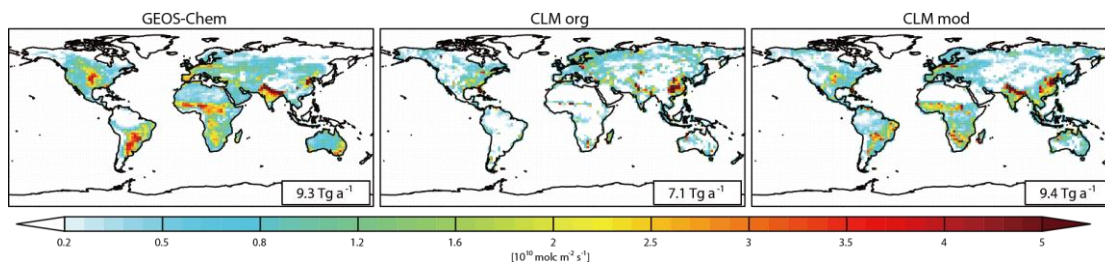

85 **Figure S1.** Above-canopy  $\text{NO}_x$  emissions from soil simulated by GEOS-Chem (left), original CLM (middle), and modified CLM (right). Annual emission totals averaged over 2006-2010 are shown inset.

90

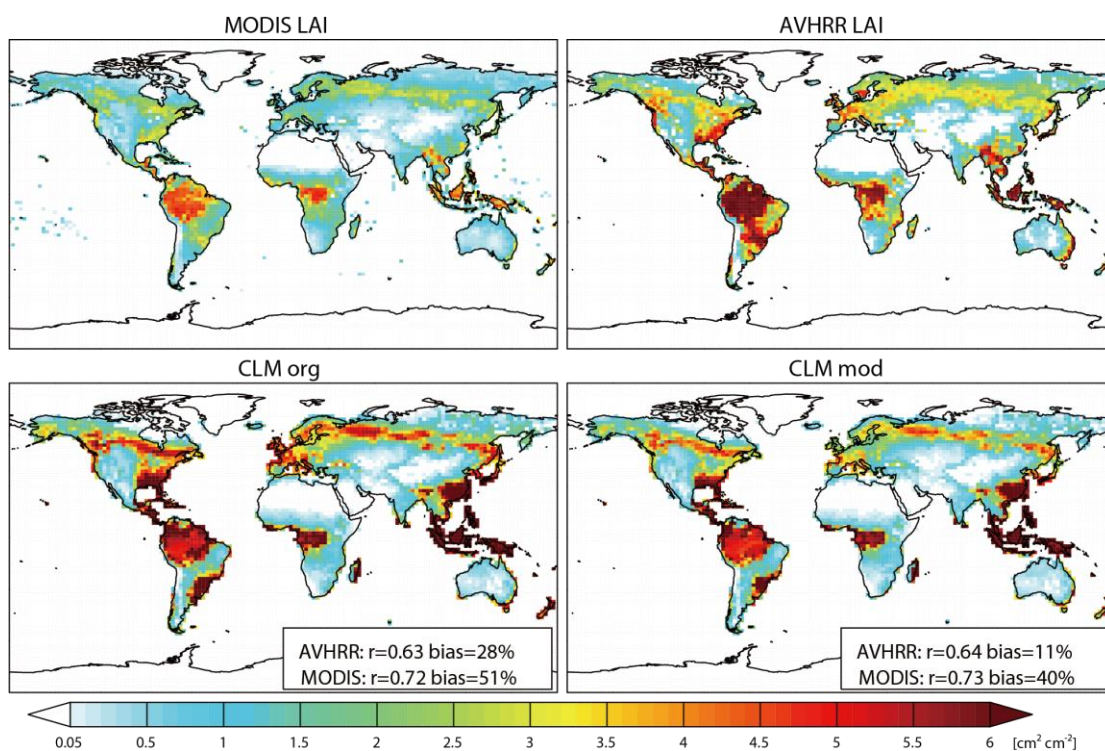

**Figure S2.** Spatial distribution of annual mean LAI observed from MODIS (top-left panel) and AVHRR (top-right panels) satellite instruments in 2000, as well as those simulated by the original CLM model (CTM org) and our modified model (CLM mod).

95

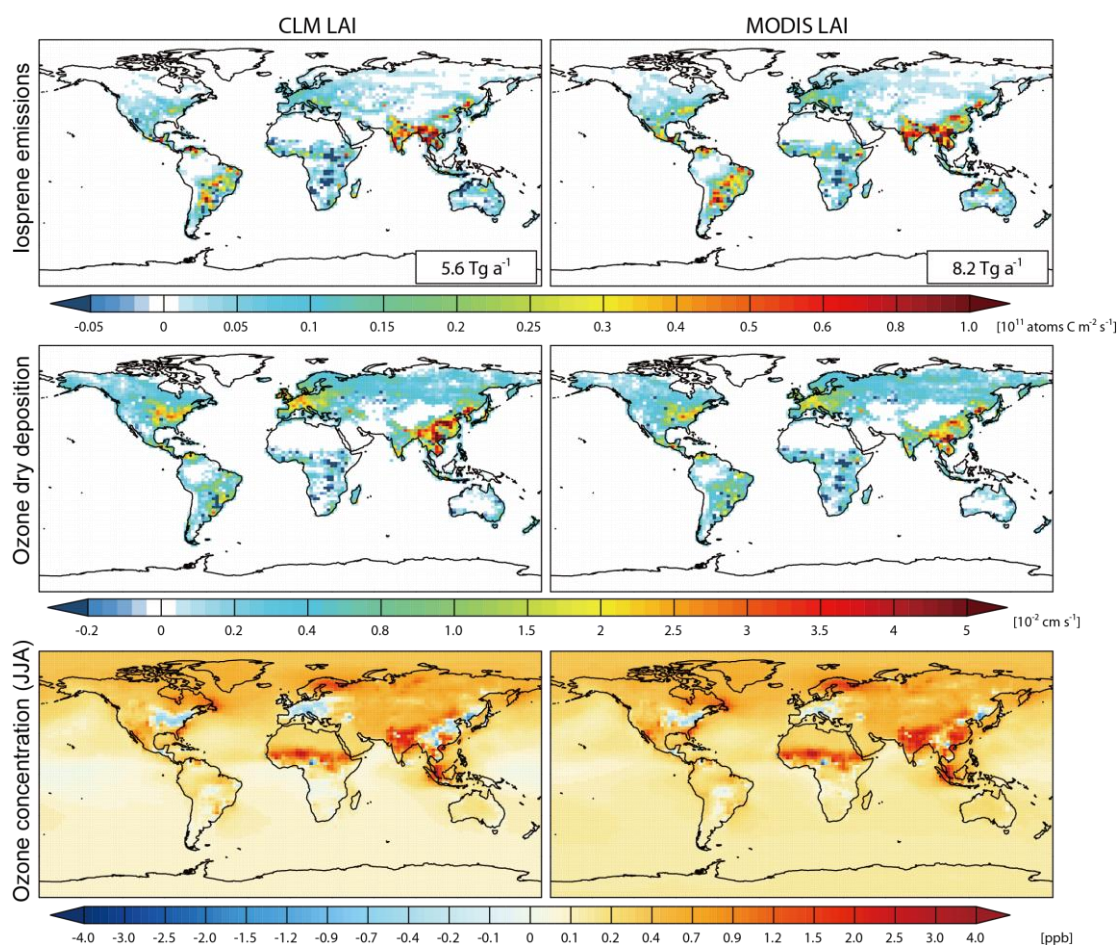

100

**Figure S3.** Anthropogenic nitrogen deposition induced changes in biogenic isoprene emissions (top panels, with annual totals shown inset), ozone dry deposition velocity (middle panels), and mean surface ozone concentration for June-July-August (bottom panels) as simulated by GEOS-Chem for 2009. Model results based on the CLM LAI (left panels) are compared to those based on the adjusted MODIS LAI (right panels). The largest differences occur over East Asia and South Asia where the CLM LAI values are distinctly biased high relative to MODIS LAI measurements.

110

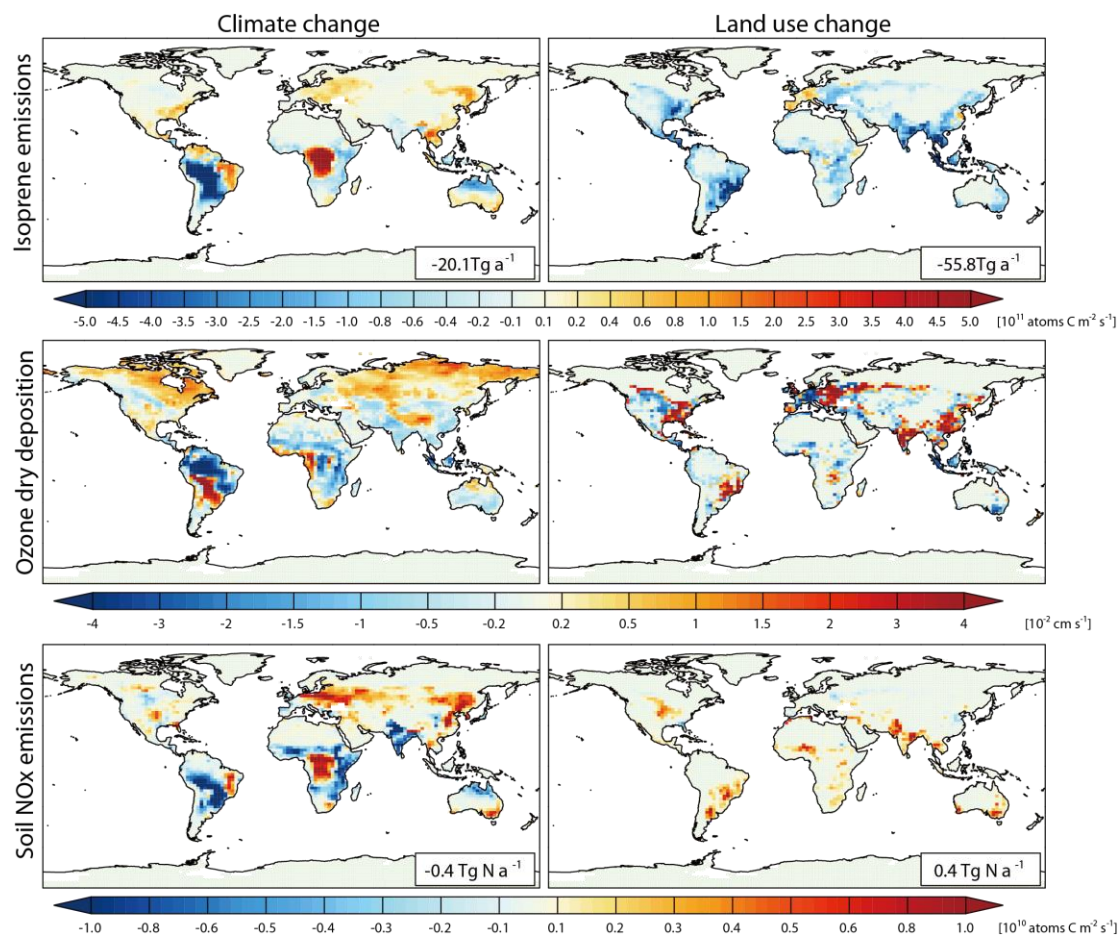

**Figure S4.** Changes in biogenic isoprene emissions (top panels), ozone dry deposition velocity (middle panels), and soil NO<sub>x</sub> emissions (bottom panels) driven by the past 20-year climate change (2006-2010 vs. 1986-1990; left column) and historical land use change (2000 vs. 1860; right column). Annual global emission totals are shown inset.

115

120

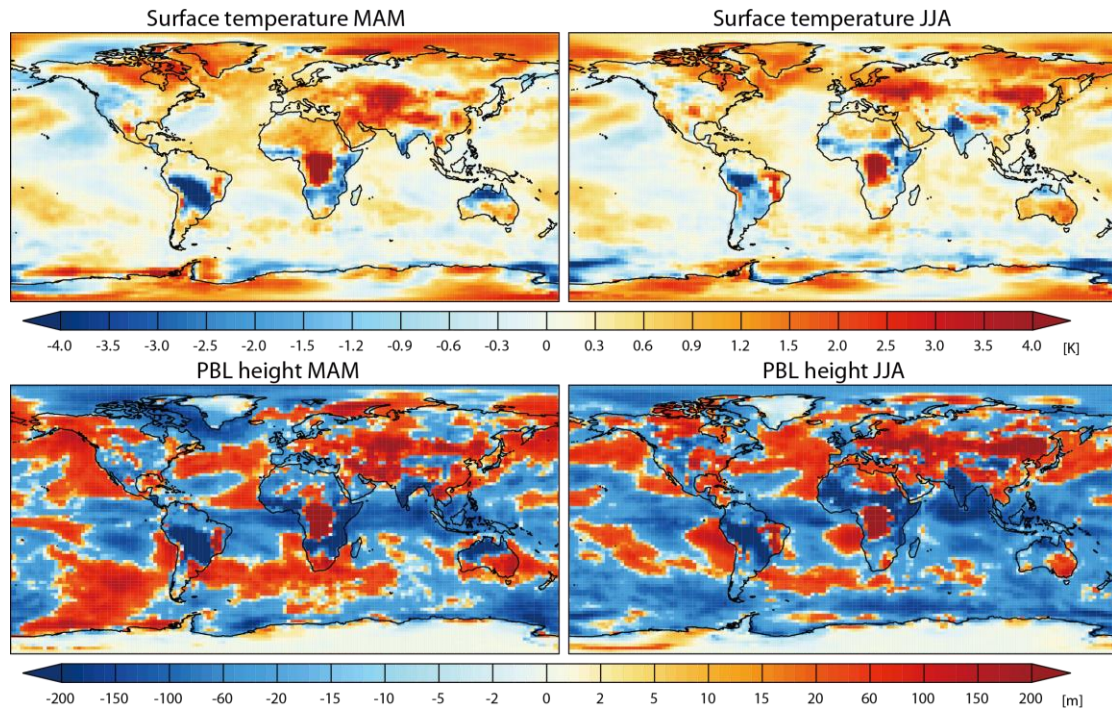

**Figure S5.** Changes in daytime mean (8:00-18:00 local time) surface temperature (top panels) and planetary boundary height (PBL) (bottom panels) from 1986-1990 to 2006-2010 averaged over March-April-May (left) and Jun-July-August (right).

## References

- 130 Davidson, E. A., and Trumbore, S. E.: Gas diffusivity and production of CO<sub>2</sub> in deep soils of the eastern Amazon, *Tellus B*, 47, 550-565, doi: 10.1034/j.1600-0889.47.issue5.3.x, 1995.
- Huang, Y., and Gerber, S.: Global soil nitrous oxide emissions in a dynamic carbon-nitrogen model, *Biogeosciences*, 12, 6405-6427, doi: 10.5194/bg-12-6405-2015, 2015.
- 135
- Hudman, R. C., Moore, N. E., Mebust, A. K., Martin, R. V., Russell, A. R., Valin, L. C., and Cohen, R. C.: Steps towards a mechanistic model of global soil nitric oxide emissions: implementation and space based-constraints, *Atmos. Chem. Phys.*, 12, 7779-7795, doi: 10.5194/acp-12-7779-2012, 2012.
- 140 Kronzucker, H. J., Siddiqi, M. Y., and Glass, A.: Kinetics of NO<sub>3</sub><sup>-</sup> Influx in Spruce, *Plant Physiology*, 109, 319-326, doi: 10.1104/pp.109.1.319, 1995.
- Kronzucker, H. J., Siddiqi, M. Y., and Glass, A.: Kinetics of NH<sub>4</sub><sup>+</sup> Influx in Spruce, *Plant Physiology*, 110, 773-779, doi: 10.1104/pp.110.3.773, 1996.
- Parton, W. J., Holland, E. A., Del Grosso, S. J., Hartman, M. D., Martin, R. E., Mosier, A. R., Ojima, D. S., and Schimel, D. S.: Generalized model for NO<sub>x</sub> and N<sub>2</sub>O emissions from soils, *Journal of Geophysical Research: Atmospheres*, 106, 17403-17419, doi: 10.1029/2001JD900101, 2001.
- 145
- Thomas, R. Q., Bonan, G. B., and Goodale, C. L.: Insights into mechanisms governing forest carbon response to nitrogen deposition: a model&ndash;data comparison using observed responses to nitrogen addition, *Biogeosciences*, 10, 3869-3887, doi: 10.5194/bg-10-3869-2013, 2013.
- 150
- Xu, R. I., and Prentice, I. C.: Terrestrial nitrogen cycle simulation with a dynamic global vegetation model, *Global Change Biology*, 14, 1745-1764, doi: 10.1111/j.1365-2486.2008.01625.x, 2008.
- 155
